## RESEARCH ARTICLE

## MARIDA: A benchmark for Marine Debris detection from Sentinel-2 remote sensing data

Katerina Kikaki<sup>1,2\*</sup>, Ioannis Kakogeorgiou<sup>1</sup>, Paraskevi Mikeli<sup>1</sup>, Dionysios E. Raitsos<sup>3</sup>, Konstantinos Karantzas<sup>1,4</sup>**1** Remote Sensing Laboratory, National Technical University of Athens, Athens, Zografou, Greece,**2** Institute of Oceanography, Hellenic Centre for Marine Research, Athens, Anavyssos, Greece,**3** Department of Biology, National and Kapodistrian University of Athens, Athens, Zografou, Greece,**4** Athena Research Center, Athens, Greece\* [akikakh@central.ntua.gr](mailto:akikakh@central.ntua.gr)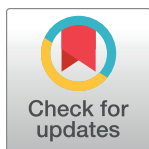

## OPEN ACCESS

**Citation:** Kikaki K, Kakogeorgiou I, Mikeli P, Raitsos DE, Karantzas K (2022) MARIDA: A benchmark for Marine Debris detection from Sentinel-2 remote sensing data. PLoS ONE 17(1): e0262247. <https://doi.org/10.1371/journal.pone.0262247>

**Editor:** Bijeesh Kozhikkodan Veetil, Duy Tan University, VIET NAM

**Received:** August 5, 2021

**Accepted:** December 20, 2021

**Published:** January 7, 2022

**Copyright:** © 2022 Kikaki et al. This is an open access article distributed under the terms of the [Creative Commons Attribution License](https://creativecommons.org/licenses/by/4.0/), which permits unrestricted use, distribution, and reproduction in any medium, provided the original author and source are credited.

**Data Availability Statement:** MARIDA dataset is available at <https://doi.org/10.5281/zenodo.5151941>.

**Funding:** Part of this research has been supported by the European Regional Development Fund of the European Union and Greek national funds through the Operational Program Competitiveness, Entrepreneurship, and Innovation, under the call RESEARCH–CREATE–INNOVATE (project code: T1EDK-02966). This work has also been supported by NEANIAS, funded by the European Union's

## Abstract

Currently, a significant amount of research is focused on detecting Marine Debris and assessing its spectral behaviour via remote sensing, ultimately aiming at new operational monitoring solutions. Here, we introduce a Marine Debris Archive (MARIDA), as a benchmark dataset for developing and evaluating Machine Learning (ML) algorithms capable of detecting Marine Debris. MARIDA is the first dataset based on the multispectral Sentinel-2 (S2) satellite data, which distinguishes Marine Debris from various marine features that co-exist, including *Sargassum macroalgae*, *Ships*, *Natural Organic Material*, *Waves*, *Wakes*, *Foam*, dissimilar water types (i.e., *Clear*, *Turbid Water*, *Sediment-Laden Water*, *Shallow Water*), and *Clouds*. We provide annotations (georeferenced polygons/ pixels) from verified plastic debris events in several geographical regions globally, during different seasons, years and sea state conditions. A detailed spectral and statistical analysis of the MARIDA dataset is presented along with well-established ML baselines for weakly supervised semantic segmentation and multi-label classification tasks. MARIDA is an open-access dataset which enables the research community to explore the spectral behaviour of certain floating materials, sea state features and water types, to develop and evaluate Marine Debris detection solutions based on artificial intelligence and deep learning architectures, as well as satellite pre-processing pipelines.

## Introduction

Marine Debris, such as plastics, is a major global issue with important environmental, economic, human health and aesthetic aspects. Plastics remain in the ocean for a long time, and have been found in various areas worldwide [1–3], affecting marine life at different trophic levels [4]. To tackle the Marine Debris issue, several solutions for detecting [5, 6], cleaning [7] and preventing [8] have been developed and validated. Among those, detecting and monitoring floating litter has recently gained the attention of most research and development efforts [9].

Horizon 2020 research and innovation programme, under grant agreement No 863448. There was no additional external funding received for this study. The funders had no role in study design, data collection and analysis, decision to publish, or preparation of the manuscript.

**Competing interests:** The authors have declared that no competing interests exist.

In particular, earth observation data from public and commercial satellite programs [10–14] have been employed for detecting and monitoring Marine Debris, as well as remote sensing data from manned aircraft [15], unmanned aerial vehicles (UAVs) [16–20], bridge-mounted [21] and underwater-cameras [22]. Spectral indices have also been proposed to enhance the detection of Marine Debris on multispectral satellite data, like the Floating Debris Index (FDI) [13] and the Plastic Index (PI) [23] that have been developed based on artificial plastic targets.

Furthermore, to better understand the spectral behaviour of Marine Debris, hyperspectral measurements have been conducted, exploring sensors' capabilities in distinguishing plastics from other features such as vegetation, natural material, and water types [24–28]. Investigating Marine Debris characteristics (including its spectral behavior) has been also attempted via multispectral satellite observations [10, 12, 13, 29], highlighting that spectral discrimination of Marine Debris from other sea surface features (e.g., ships, foam) is not straightforward. Indeed, differentiating floating plastic debris from bright features, such as waves, sunglint, clouds, is currently considered very challenging [5, 6]. This is due to the fact that plastics have complex properties, diversifying in color, chemical composition, size and level of water submersion [30, 31]. A high-quality dataset can address the challenges mentioned above, supporting also the development and improvement of Marine Debris detection methods, and assessing the operational aspects of any given solution (e.g., scalability).

However, despite the challenging and continuously growing issue of Marine Debris, the currently available datasets are relatively limited in number and do not usually employ open-access high-resolution satellite data over geographically extended areas. These facts prohibit satellite data exploitation from ML frameworks and operational solutions. In addition, most of the currently available marine remote sensing datasets focus on detecting specific objects such as vessels [32–35]. Datasets for cloud detection over the ocean [36] and *Sargassum* macroalgae extraction [37, 38] have also been developed with a limited number of classes.

To this end, this study aims to fill this gap with a new, open-access benchmark dataset, named MARIDA—MARIne Debris Archive, based on S2 multispectral satellite data. MARIDA offers real cases with Marine Debris events, providing globally distributed annotations, ready for ML tasks. The produced dataset takes an innovative step forward by containing sea features that co-exist in remote sensing images, ultimately forming 15 thematic classes in total. Along with MARIDA, ML baselines for the weakly supervised semantic segmentation task [39] are presented, including shallow ML and deep neural network architectures. To enlarge the benchmark application area, the multi-label classification task is also considered.

## Materials and methods

### Dataset specifications

MARIDA is an open-source dataset consisting of annotated georeferenced polygons/pixels on S2 satellite imagery. MARIDA was designed to be temporally and geographically well-distributed; thus, we used open-access data from the S2 satellite sensor which coverage includes global coastal waters. S2 is capable of detecting and continuous monitoring large floating debris, as it provides multispectral data at a spatial resolution of 10 m and 20 m with a frequent revisit time of 2–5 days.

Regarding Marine Debris ground-truth data, reported events were collected from citizen scientists and social media over coastal areas and river mouths. After identifying these cases in S2 satellite data, the events were verified with very high-resolution satellite data (whenever possible due to availability), and the corresponding Marine Debris pixels were annotated. Additionally, sea surface features that co-occurred on satellite images were annotated: *Ships*,

*Sargassum macroalgae*, *Foam*, *Waves* and *Natural Organic Material* (i.e., vegetation and woody), water types (i.e., *Clear*, *Turbid Water* and *Sediment-Laden Water*), *Shallow Coastal Waters* including benthic habitats, *Clouds* and *Cloud Shadows*. Regarding the annotation procedure, three image-interpretation experts annotated the satellite images by assessing the spectral and spatial patterns of all features, considering the limitations of the S2 sensor (i.e., different band resolutions and limited signal-to-noise ratio) [40]. Finally, an inter-annotator agreement protocol was established to merge the annotated data and aggregate the confidence levels derived from the three experts (see the Annotation process and protocol section).

The current benchmark dataset aims to support real-world scientific issues that could eventually not only facilitate research efforts in Marine Debris, but also offer operational monitoring solutions. Thus, MARIDA consists of realistic, non-iconic and non-ideal (e.g., with term ideal, we refer to cloud-free data during calm sea state conditions) satellite observations. MARIDA's annotations are also sparse to reduce the potentially noisy labels due to the complexity of sea surface features. The annotated polygons with real cases on S2 images (10 m resolution) do not correspond to thematic class endmembers or pure/clear pixels (in some cases, we annotated sparse Marine Debris pixels or floating materials pixels under very thin clouds).

### Data collection and annotation

For constructing MARIDA, a specific process was designed and followed, including three major steps (Fig 1): i) collection of reports (ground-truth data and literature) regarding floating Marine Debris events in coastal areas, ii) satellite data acquisition and processing, auxiliary weather data collection, spectral indices calculation, image interpretation and annotation, statistical analysis, and iii) MARIDA dataset generation and ML benchmarking.

**Marine Debris reports.** For a seven-year period (2015–2021), we gathered reports on marine litter and plastic pollution across coastal areas and river mouths in several countries (Table 1). The reports included observations gathered by photographers and citizen scientists, and information extracted from media, social media, and ocean clean-up activities. The URLs of the reports used are included in the S1 Table.

In addition to ground-truth data collection, the MARIDA dataset also included published satellite-derived data on Marine Debris detection [10, 13], and observations from rivers that have been reported in the literature as major polluters [2, 41–45]. Table 1 demonstrates the source of the reported data (i.e., ground-truth and indicated by literature), as well as the

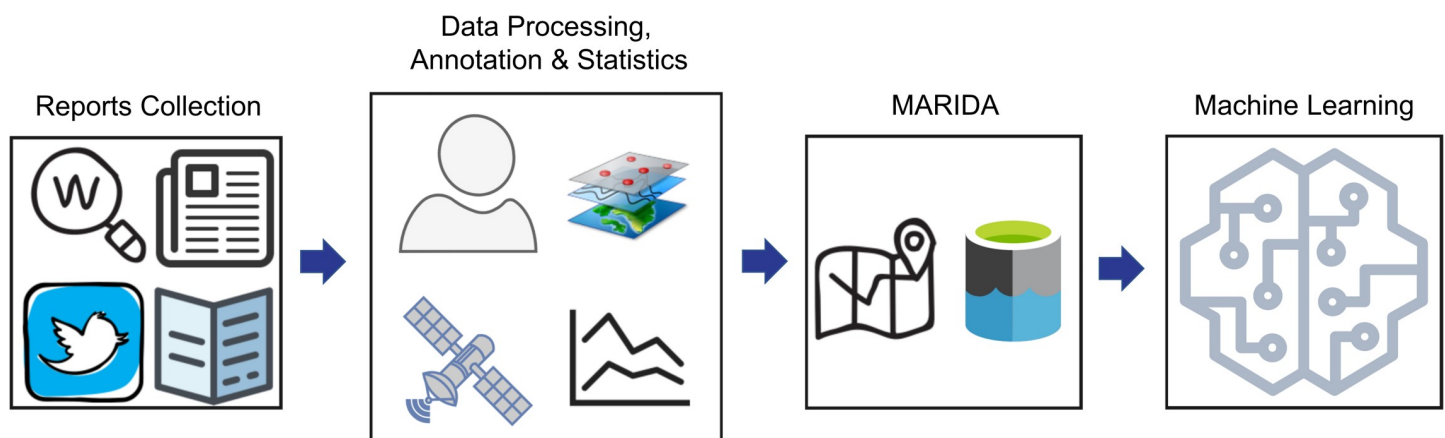

**Fig 1. Schematic diagram representing the different steps for the construction of Marine Debris Archive-MARIDA.**

<https://doi.org/10.1371/journal.pone.0262247.g001>

**Table 1. Collected Marine Debris reports across different countries and continents for the period 2015–2021.** The table shows the regions along with the reported events information (source, date and exact location).

| Continent/ Country     | S2 Tile         | Source                   | Date     | Location (WGS'84)          |
|------------------------|-----------------|--------------------------|----------|----------------------------|
| C. America/ Guatemala  | 16PCC           | Citizen Scientist        | 18/9/20  | 15.836206° N, 88.022087° W |
| C. America/ Guatemala  | 16PCC           | Photographer             | 16/6/18  | 15.827222° N, 88.047500° W |
| C. America/ Guatemala  | 16PCC           | Kikaki et al. (2020)     | 4/9/19   | 14.9827° N, 89.5442° W     |
| C. America/ Honduras   | 16PDC           | Citizen Scientist        | 18/9/20  | 16.1490° N, 87.6282° W     |
| C. America/ Honduras   | 16PEC, 16QED    | Citizen Scientist        | 23/9/20  | 16.042194° N, 86.432081° W |
| C. America/ Honduras   | 16PEC           | Kikaki et al. (2020)     | 29/11/15 | 16.0667° N, 86.3965° W     |
| N. America/ S. Domingo | 19QDA           | Media                    | 13/7/18  | 18.467723° N, 69.886808° W |
| N. America/ Haiti      | 18QWF/ QYF/ QYG | 4ocean Clean-Ups         | 20/3/20  | -                          |
| N. America/ Haiti      | 18QWF/ QYF/ QYG | 4ocean Clean-Ups         | 5/1/21   | -                          |
| N. America/ Haiti      | 18QWF/ QYF/ QYG | 4ocean Clean-Ups         | 9/12/20  | -                          |
| N. America/ Haiti      | 18QWF/ QYF/ QYG | 4ocean Clean-Ups         | 15/12/20 | -                          |
| Asia/ Indonesia        | 50LLR           | Social Media             | 4/3/18   | 8.715828° S, 115.446799° E |
| Asia/ Vietnam          | 48PZC           | Social Media             | 23/11/19 | 15.994762° N, 108.27417° E |
| Asia/ Philippines      | 51PTS           | Social Media             | 18/5/19  | -                          |
| Asia/ Philippines      | 51PTS           | Social Media             | 16/7/16  | -                          |
| Europe/ Scotland       | 30VWH           | Biermann et al. (2020)   | 20/4/18  | -                          |
| Africa/ South Africa   | 36JUN           | Biermann et al. (2020)   | 24/4/19  | -                          |
| Asia/ South Korea      | 52SDD           | Jang et al. (2014)       | -        | -                          |
| Asia/ Indonesia        | 48MXU/ MYU      | Cordova & Nurhati (2019) | -        | -                          |
| Asia/ China            | 51RVQ           | Zhao et al. (2019)       | -        | -                          |

<https://doi.org/10.1371/journal.pone.0262247.t001>

corresponding date and location, when available. For each area, corresponding S2 tiles are also included (Table 1).

**Satellite data.** Based on the ground-truth events, the corresponding S2 level1C images were acquired from Copernicus Hub (<https://scihub.copernicus.eu/>) for the exact reported dates and locations using a mean time window of 10 days. Additionally, for the regions that are significantly affected by plastic pollution (such as river discharges), the seasonality and the periods of maximum plastic presence were examined. We also extended our research for the entire 2015 to 2021 period, focusing on the major recorded rainfalls (<https://power.larc.nasa.gov/data-access-viewer/>).

At an early stage for selecting images with potential Marine Debris, we visually inspected S2 Red-Green-Blue (RGB) composites along with very high-resolution Planet (<https://www.planet.com>) and Google Earth imagery, when available (see S2 and S3 Tables). The S2 data in which the visual inspection indicated Marine Debris occurrence were further processed. Rayleigh reflectance values were extracted at 10 m resolution for 11 bands using ACOLITE atmospheric processor [46], excluding Vapour (Band 9) and Cirrus (Band 10). To improve the accuracy of the following annotation step, FDI [13] and FAI [47] spectral indices were calculated.

**Annotation process and protocol.** During this step, three image-interpretation experts had access to the gathered data, including reports, S2, Planet satellite imagery, and computed spectral indices. The annotators digitized Marine Debris based on ground-truth events, considering S2 sensor limitations, and employing domain knowledge about its spectral behaviour [10, 12, 13, 29, 30, 40] and its accumulation patterns (i.e., fronts, marine litter windrows) [48]. A laborious and intensive image interpretation and manual assessment of each pixel were performed for all selected images leading to Marine Debris annotations at pixel level. In addition,

diverse floating objects, sea state features, water types and clouds were annotated based on image interpretation and established spectral patterns [31, 49–53]. Wind data were also utilized (<https://power.larc.nasa.gov/data-access-viewer/>) to examine the possibility of whitecaps, which may appear similar to plastics in human eye [31].

Expert annotators recorded the thematic class and their confidence level for each digitized polygon. In particular, all annotated polygons were labelled with three confidence levels (i.e., #1 for high confidence, #2 for moderate and #3 for low confidence level). After the annotation step, an inter-annotators agreement protocol was established, which is described below:

- i. For Marine Debris, *Natural Organic Material* and *Sparse Sargassum*, which occasionally can have similar spectral behaviour [40], the intersection per two annotators extracted (i.e., an agreement between at least two annotators regarding the class label). If so, the lowest confidence level that was originally assigned was kept for these cases.
- ii. For the other features, the union of the annotated data was calculated. If at least two contradictory annotated classes existed for the same digitized area, the annotation was excluded. For the rest of the cases, where the three experts agreed regarding polygon labeling, the lowest confidence score was kept.

For each annotation, Marine Debris report existence was also recorded (i.e., #1 when exact date and locations were identified and matched to the available reports, #2 when patches were identified at a distance of either up to 20km or up to 6 days apart from the reported locations and dates; and #3 for no recorded reports close to the detected debris). Additionally, the cases that debris was detected based on previous studies reporting river discharges, were labelled under category 3 (Table 1).

For further details regarding our annotation strategy (cloud annotation and cases with floating materials and thin clouds interference) the reader is referred to the [S1 Appendix](#).

**Refining data.** In order to improve the quality of our annotated data, the structure of the recorded high-dimensional observations (i.e., 11 multispectral bands) was visualized and explored. Specifically, to examine the pairwise distances between the high-dimensional annotated pixels, we utilized t-distributed Stochastic Neighborhood Embedding (t-SNE) algorithm proposed by Van der Maaten [54], using Spectral Angle Mapping (SAM) [30, 40, 55] as a distance metric. By representing our data in a 2D space, spectral patterns of thematic classes were mapped and outliers were identified and further explored (revisit the data to determine if they had been erroneously annotated).

The annotation procedure resulted in a vector dataset of the digitized polygons, in shapefile format. The dataset was converted into a raster structure, which was finally cropped into non-overlapping 256x256 pixel-sized patches. After the cropping, each patch was available for extra visual inspection.

## Machine learning frameworks

**Baselines.** In order to trigger more research efforts towards Marine Debris detection methods and solutions, we provide software baselines for *weakly supervised* pixel-level semantic segmentation tasks, by employing a Random Forest model (RF) [56] and an U-Net architecture [57].

In particular, RF is a well-established supervised model, which has been widely used in remote sensing and computer vision community. A RF classifier consists of many decision trees and uses averaging to improve the predictive performance and control over-fitting. For our RF model, we extracted features similar to the first place team of Track 2 of the 2020 IEEE GRSS Data Fusion Contest [58]. We trained three different RF models: i) one based on spectral

signatures of each pixel ( $RF_{SS}$ ), ii) one based on spectral signatures and calculated spectral indices ( $RF_{SS+SI}$ ), and iii) one with spectral signatures, spectral indices, and extracted Gray-Level Co-occurrence Matrix (GLCM) [59] textural features ( $RF_{SS+SI+GLCM}$ ) in order to incorporate the spatial information. The extracted spectral indices were NDVI, NDWI, FAI, FDI, Shadow Index (SI), Normalized Difference Moisture Index (NDMI), Bare Soil Index (BSI) and NRD [40, 60], which are broadly used in remote sensing studies. To compute the GLCM features, Rayleigh corrected RGB composites were converted to grayscale images which consequently were quantized in 16 bins-level. The selected GLCM features were Contrast (CON), Dissimilarity (DIS), Homogeneity (HOMO), Energy (ENER), Correlation (COR) and Angular Second Moment [59]. For those features extraction, a window of size 13 x 13 was used.

The U-Net is a well-established deep learning model for semantic segmentation. Its architecture consists of two parts, the down-sampling and the up-sampling part. The first part encodes the input image yielding a low dimensional representation using successive blocks of 3 x 3 convolutions for features extraction and max-pooling layers for down-sampling. The feature maps/ produced channels are doubled in each block, while the spatial dimensions are reduced by half. The second part decodes the internal representation using successive up-convolution layers to create the final segmentation output.

For our task, the first input layer of U-Net was modified to adapt to the 11 Rayleigh reflectance S2 bands, and the final classification layer was changed to output the MARIDA classes. We also used 4 down-sampling and up-sampling blocks, as well as 16 hidden channels produced by the initial down-sampling block.

To assess pixel-level semantic segmentation performance, we relied on three metrics. Our main evaluation metric was the Jaccard Index or Intersection-over-Union (IoU) [61]. In addition, the average for each class  $F_1$  score (Macro- $F_1$ /  $mF_1$ ) and the Pixel Accuracy (PA) for the per-class assessment were employed (S2 Appendix).

Through MARIDA, we also provide multi-labels in patch-level, which formulate a weakly-supervised multi-label classification task with positive, and absent labels that are not necessarily negative [62, 63]. For the baseline of the multi-label classification task, we adopted the Residual neural network (ResNet) [64]. The evaluation metrics for the multi-label classification task are demonstrated in the S2 Appendix and the proposed baseline in the S4 Appendix.

## MARIDA dataset and analysis

MARIDA contains 1381 patches, consisting of 837,357 annotated pixels, based on 63 S2 scenes acquired from 2015 to 2021. MARIDA provides patches with corresponding masks of pixel-wise annotated classes and confidence levels in the format of GeoTiff. For each patch, the assigned multi-labels are given in a JSON file. In addition, MARIDA includes shapefiles data in WGS'84/ UTM projection, with file naming convention following the below scheme:  $s2\_dd-mm-yy\_tnt$ , where  $s2$  denotes the S2 sensor,  $dd$  denotes the day,  $mm$  the month,  $yy$  the year and  $tnt$  denotes the S2 tile. Shapefiles data include the class of each annotation, along with the confidence score and the report description. The produced dataset is composed of geodata, covering different sites around the globe (Fig 2). The selected study sites are distributed over eleven countries (i.e., Honduras, Guatemala, Haiti, Santo Domingo, Vietnam, South Africa, Scotland, Indonesia, Philippines, South Korea and China).

## Thematic class distribution

To demonstrate the descriptive overview of MARIDA, the class and pixel distributions are presented in Tables 2 and 3 and their spectral and statistical analysis are illustrated in Figs 3 and 4. More specifically, the 15 different classes of MARIDA are shown in Table 2, which includes

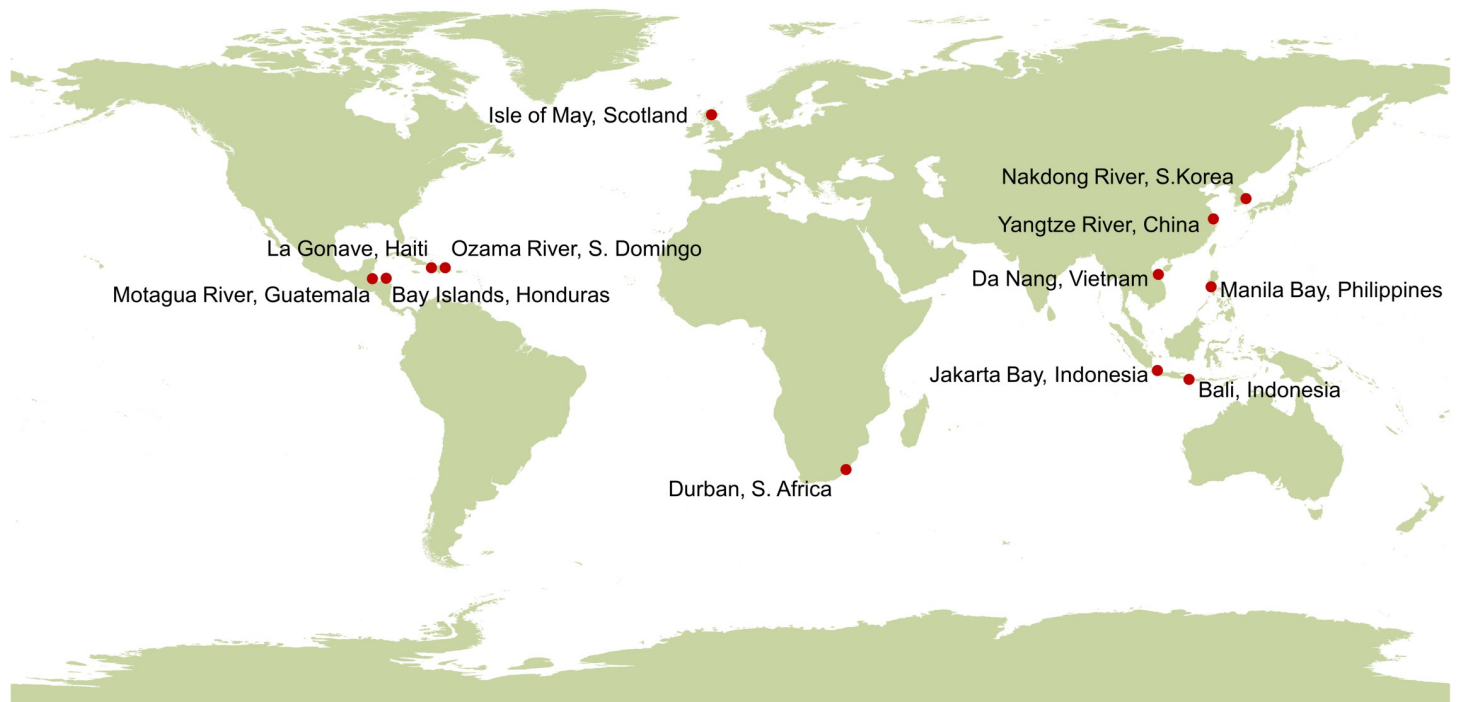

**Fig 2. The sites (red dots in the map) where Marine Debris events were reported, and corresponding Sentinel-2 satellite images were acquired and processed.** Marine Debris and other features that co-existed were annotated in considered satellite data. The corresponding map is acquired from Natural Earth (<http://www.naturalearthdata.com/>).

<https://doi.org/10.1371/journal.pone.0262247.g002>

the class description, the corresponding number of provided image patches, and all acronyms of the annotated classes. Regarding the class distribution, the *MWater* class has been digitized in 870 patches due to its implicit abundance in satellite data and straightforward annotation. As proposed by Hu [40], we have included additional *MWater* pixels that were close to Marine

**Table 2. The thematic classes of MARIDA.** Name, description and corresponding number of patches are presented for each class. All acronyms are stated here.

| Class Name               | Acronym  | Description                                                     | Number of Patches |
|--------------------------|----------|-----------------------------------------------------------------|-------------------|
| Marine Debris            | MD       | Floating plastics or other polymers, mixed anthropogenic debris | 373               |
| Dense <i>Sargassum</i>   | DenS     | Dense floating <i>Sargassum</i> macroalgae                      | 49                |
| Sparse <i>Sargassum</i>  | SpS      | Sparse floating <i>Sargassum</i> macroalgae                     | 106               |
| Natural Organic Material | NatM     | Vegetation & Wood                                               | 71                |
| Ship                     | Ship     | Sailing & Anchored Vessels                                      | 182               |
| Clouds                   | Cloud    | Clouds including thin Clouds                                    | 181               |
| Marine Water             | MWater   | Clear Water                                                     | 870               |
| Sediment-Laden Water     | SLWater  | High-Sediment river discharges with brown colour                | 51                |
| Foam                     | Foam     | Foam recorded at river fronts or coastal wave breaking area     | 59                |
| Turbid Water             | TWater   | Turbid waters close to coastal areas                            | 220               |
| Shallow Water            | SWater   | Coastal waters, including coral reefs and submerged vegetation  | 64                |
| Waves                    | Waves    | Waves                                                           | 54                |
| Cloud Shadows            | CloudS   | Cloud Shadows                                                   | 71                |
| Wakes                    | Wakes    | Wakes & Waves from a sailing vessel                             | 106               |
| Mixed Water              | MixWater | Water near floating materials                                   | 140               |
| <b>Total</b>             |          |                                                                 | <b>1381</b>       |

<https://doi.org/10.1371/journal.pone.0262247.t002>

**Table 3. MARIDA’s class distribution at pixel-level.** For Sentinel-2 tiles description, the reader is referred to [Table 1](#). For classes acronyms, the reader is referred to [Table 2](#).

| S2 Tile             | MD          | DenS        | SpS         | NatM       | Ship        | Cloud         | MWater        | SLWater       | Foam        | TWater        | SWater       | Waves       | CloudS       | Wakes       | MixWater    | # of pixels   | # of S2 scenes |
|---------------------|-------------|-------------|-------------|------------|-------------|---------------|---------------|---------------|-------------|---------------|--------------|-------------|--------------|-------------|-------------|---------------|----------------|
| 16PCC               | 1496        | 2048        | 574         | 78         | 3322        | 62082         | 60169         | 285886        | 712         | 99501         | 3960         | 3417        | 3585         | 5929        | 191         | 532950        | 19             |
| 16PDC               | 143         | 49          | 226         | 78         | 96          | 13507         | 15258         | 85449         | 334         | 24923         | 2251         | 0           | 883          | 253         | 75          | 143525        | 6              |
| 16PEC               | 129         | 222         | 645         | 193        | 485         | 11678         | 19341         | 11            | 86          | 27080         | 3782         | 108         | 1733         | 1115        | 51          | 66659         | 6              |
| 16QED               | 0           | 474         | 691         | 0          | 90          | 4098          | 1719          | 0             | 0           | 0             | 5910         | 0           | 1841         | 221         | 0           | 15044         | 2              |
| 18QWF               | 0           | 0           | 0           | 0          | 0           | 0             | 324           | 0             | 0           | 0             | 0            | 1461        | 0            | 0           | 0           | 1785          | 1              |
| 18QYF               | 1112        | 4           | 200         | 154        | 408         | 7977          | 1360          | 0             | 0           | 0             | 1038         | 0           | 314          | 48          | 58          | 12673         | 13             |
| 18QYG               | 90          | 0           | 0           | 7          | 0           | 373           | 222           | 0             | 0           | 831           | 277          | 0           | 106          | 0           | 15          | 1921          | 1              |
| 19QDA               | 0           | 0           | 21          | 3          | 11          | 0             | 110           | 0             | 0           | 5             | 40           | 0           | 0            | 0           | 0           | 190           | 1              |
| 30VWH               | 27          | 0           | 0           | 0          | 36          | 3505          | 24393         | 0             | 0           | 0             | 0            | 0           | 1975         | 0           | 0           | 29936         | 1              |
| 36JUN               | 46          | 0           | 0           | 0          | 625         | 3500          | 600           | 0             | 0           | 300           | 0            | 0           | 0            | 18          | 0           | 5089          | 1              |
| 48MXU               | 208         | 0           | 0           | 0          | 71          | 5807          | 194           | 0             | 0           | 382           | 45           | 0           | 489          | 15          | 12          | 7223          | 2              |
| 48MYU               | 24          | 0           | 0           | 0          | 223         | 0             | 291           | 0             | 0           | 10            | 48           | 0           | 0            | 611         | 0           | 1207          | 2              |
| 48PZC               | 24          | 0           | 0           | 0          | 298         | 4108          | 2079          | 0             | 48          | 4129          | 0            | 0           | 765          | 171         | 1           | 11623         | 3              |
| 50LLR               | 41          | 0           | 0           | 3          | 27          | 402           | 485           | 0             | 41          | 0             | 18           | 841         | 0            | 72          | 5           | 1935          | 1              |
| 51PTS               | 38          | 0           | 0           | 20         | 17          | 0             | 35            | 0             | 0           | 0             | 0            | 0           | 0            | 0           | 0           | 110           | 2              |
| 51RVQ               | 17          | 0           | 0           | 0          | 0           | 363           | 163           | 0             | 0           | 0             | 0            | 0           | 37           | 0           | 0           | 580           | 1              |
| 52SDD               | 4           | 0           | 0           | 328        | 94          | 0             | 2416          | 1591          | 4           | 451           | 0            | 0           | 0            | 37          | 2           | 4927          | 1              |
| <b>Total pixels</b> | <b>3399</b> | <b>2797</b> | <b>2357</b> | <b>864</b> | <b>5803</b> | <b>117400</b> | <b>129159</b> | <b>372937</b> | <b>1225</b> | <b>157612</b> | <b>17369</b> | <b>5827</b> | <b>11728</b> | <b>8490</b> | <b>410</b>  | <b>837377</b> | <b>63</b>      |
| <b>Perc. %</b>      | <b>0,41</b> | <b>0,33</b> | <b>0,28</b> | <b>0,1</b> | <b>0,69</b> | <b>14,02</b>  | <b>15,42</b>  | <b>44,54</b>  | <b>0,15</b> | <b>18,82</b>  | <b>2,07</b>  | <b>0,70</b> | <b>1,40</b>  | <b>1,01</b> | <b>0,05</b> | <b>100</b>    |                |

<https://doi.org/10.1371/journal.pone.0262247.t003>

Debris pixels, in order not only to facilitate further experiments with SAM, but also run experiments on pixel windows (3x3 or 5x5) and reflectance difference. The second-highest number of 373 patches were labelled as Marine Debris, indicating the high variety of annotations in different patches. *Cloud*, *Ship* and *Turbid Water* were annotated in a sufficient number of patches (~200), as they are plenty in the natural environment and easily identified by annotators.

The rest of the categories were digitized in fewer patches (appr. 50–100). Some of the considered categories, such as *SLWater*, *Sargassum* blooms, *CloudS*, *SWater* were easily digitized with compact, not extended polygons, while *Foam*, *NatM*, *Wakes* and *Waves* required a laborious and intensive manual assessment. Considering that MARIDA is a Marine Debris-oriented

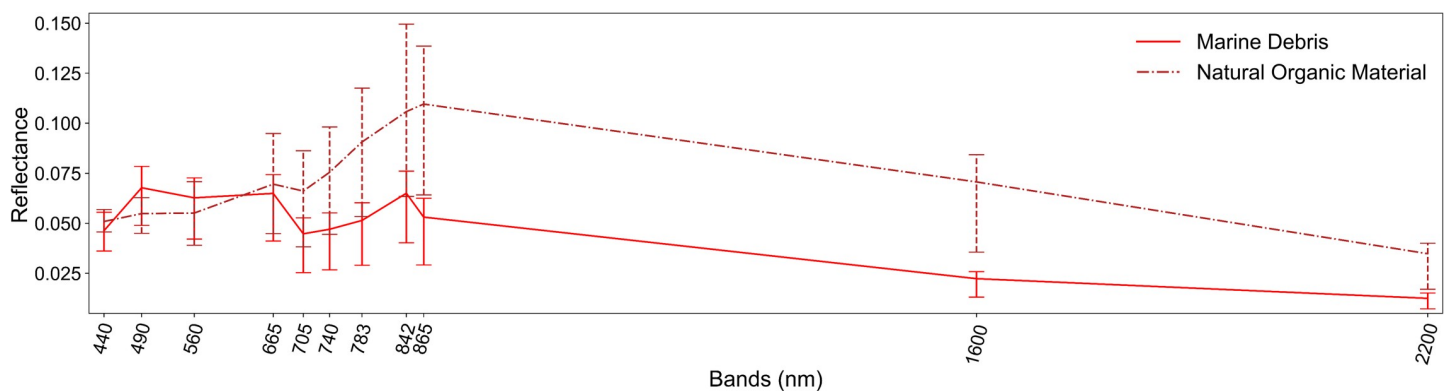

**Fig 3. The spectral signatures of the Marine Debris and Natural Organic Material classes derived from the annotations with the high confidence levels.** The mean spectral signatures are presented with 25–75 percentiles as error bars.

<https://doi.org/10.1371/journal.pone.0262247.g003>



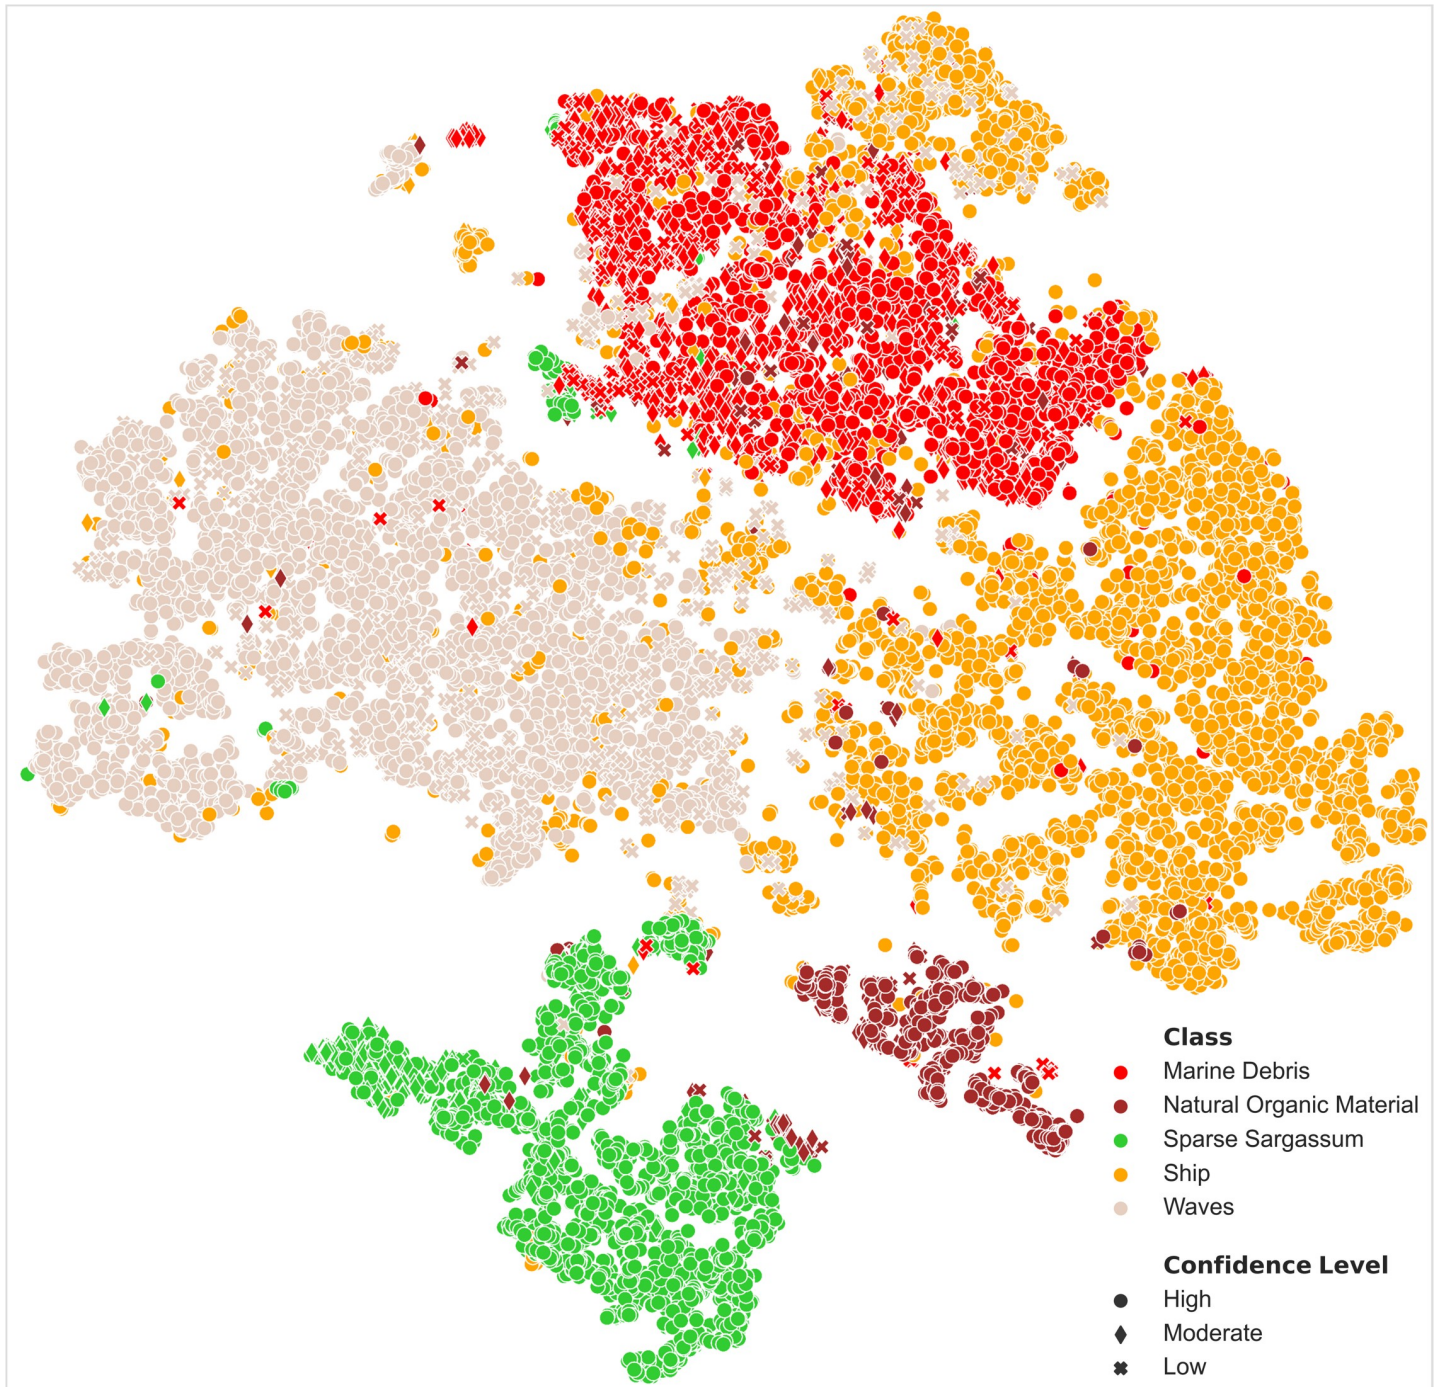

**Fig 4. A 2D embedding using T-SNE algorithm with SAM metric for the classes: Marine Debris, Ships, Sparse Sargassum, Natural Organic Material and Waves.** Each class is represented with a different color. Different symbols demonstrate the confidence level of annotations.

<https://doi.org/10.1371/journal.pone.0262247.g004>

dataset, we provide only a certain number of indicative cases with the classes mentioned above. The artifact due to the dissimilar S2 band resolutions led to a specific spectral signature primarily recorded on surrounding water pixels of Marine Debris, *SpS* and *Ship*. This class was labelled as *MixWater*, as it corresponds to water, and digitized around annotated Marine

Debris pixels. For more details about patches and class co-occurrence, readers are referred to the online material (<https://marine-debris.github.io/>).

Apart from the per-patch analysis, we also discuss the pixel-level distribution of MARIDA classes. [Table 3](#) summarizes the class distribution in pixel level for each S2 tile, indicating that MARIDA provides numerous pixels annotated in 17 S2 tiles. Overall, most given pixels correspond to Honduras Gulf, a known plastic polluted region where a thorough remote-sensing study has been previously conducted by Kikaki et al. [10], based on ground-truth data. It should be noted that, although we avoided digitizing extended regions with water or clouds, the produced dataset cannot be balanced at pixel-level due to the implicit different size and characteristics of considered sea features. Indeed, our goal was to create a Marine Debris-oriented dataset.

To this end, we provide a significant number of 3339 Marine Debris pixels in total. The 1625 pixels were digitized and annotated with high confidence, based on reports and domain knowledge. Additionally, 1235 pixels were labelled with moderate and 539 pixels with low confidence ([S4 Table](#)). For scenes with large garbage trajectories and high confidence annotations, the readers are referred to 18 September 2020 (tile 16PCC) and 14 March 2020 (tile 18QYF), where ground-truth events were available. An indicative case with dense marine litter patches at Motagua river mouth was also evident on 4 September 2016 (tile 16PCC). For other scenes with high-confidence Marine Debris annotated data, the reader can consider the online material (<https://marine-debris.github.io/>).

### Spectral signatures

To study the spectral behavior of Marine Debris annotated data, we extracted the mean spectral signatures for each scene, leading to a detailed analysis presented thoroughly in the online material. The mean spectral reflectance of annotated pixels with high confidence in MARIDA is depicted in [Fig 3](#). The mean spectral signatures are presented along with 25–75 percentiles as error bars to demonstrate the variation along with the skewness of their distribution. Atmospheric correction process, diverse proportions of floating Marine Debris within pixels, differences resulting from colours and immersion, and mixed conditions in the natural environment led to high variability of recorded Marine Debris spectral signatures.

However, the recorded Marine Debris mean spectral reflectance is very similar with the corresponding simulated signature proposed recently by Hu [40]. Slightly higher values in our data indicate different debris proportions within pixels. In comparison with previous studies [10, 12, 13], which exploited S2 imagery, higher reflectance at Green and Red bands was observed, possibly due to the denser patches that we recorded. Additionally, the mean spectral signature of high-confidence *NatM* was considered for comparison, as in some cases with low subpixel proportions, their spectral discrimination was not straightforward. Regarding Marine Debris and *NatM* comparison, it was found that their discrimination might be possible in 865 nm and SWIR bands.

### Statistical analysis

By applying t-SNE algorithm along with spectral signatures analysis described above ([Figs 3 and 4](#), online material), important insights were gained about spectral behaviour of floating Marine Debris and the potential of spectral discrimination from other features with similar patterns such as *SpS*, *Ship*, *Waves* and *NatM*.

[Fig 4](#) presents t-SNE results for the considered features, indicating the different confidence level for each annotation with a different symbol. Based on the recorded data, a well-shaped Marine Debris cluster was developed, which is discrete from other clusters. Very sparse

recorded Marine Debris (e.g., 20 April 2018 in Scotland) led to a smaller separate cluster between *Waves* and Marine Debris. A well-shaped *Ship* cluster was also mapped, yet some annotated *Ship* pixels were depicted in Marine Debris cluster due to the similar polymer types. Respectively, some dense Marine Debris pixels were mapped in the *Ship* cluster. Some *Ship* pixels were also depicted close to *Waves* pixels; this is evident in cases with moving vessels, where discrimination of boundary *Ship* pixels from water-related classes (i.e., *Wakes*) was challenging for a human expert.

Occasionally, *NatM* cannot be spectrally separated from Marine Debris (e.g., 18 September 2020 at Motagura river mouth). Mixed conditions at the river mouth, low coverage at pixel-level and potentially colored marine litter (e.g., green or brown) led to uncertainties represented with low confidence Marine Debris and *NatM* annotations. However, dense *Natural* woody debris has a discrete spectral signature (e.g., 7 October 2018 at Nakdong river mouth). This fact was also confirmed by a smaller (but well-shaped) *NatM* cluster depicted in brown color (Fig 4). A discrete *SpS* cluster was also formed, including *NatM* (i.e., vegetation). In some cases the *SpS* annotated pixels have been mapped in the Marine Debris and *Waves* clusters, though, the majority of these cases corresponded to sparse floating materials that were detected at a lower subpixel level. This fact confirms that sparse floating vegetation pixels in some cases cannot be spectrally discriminated from sparse marine litter pixels (e.g., 4 March 2018 in Bali) [40].

## MARIDA benchmark and ML baselines

MARIDA is designed to be beneficial for several remote sensing applications and tasks which are described in detail in the following section (Discussion). However, it primarily aims to benchmark weakly supervised pixel-level semantic segmentation learning methods. In particular, the produced dataset falls into incomplete-supervision due to sparsely annotated data, inexact-supervision due to sensor limitations (i.e., 10 m resolution, different bands resolution), and inaccurate supervision derived from potential slightly noisy annotations (i.e., sensor noise, human error) [40].

## Dataset split and training procedure

MARIDA was split into train, validation and test disjoint sets. The data were not split randomly; instead, each data split was produced as a representative subset of the whole dataset. For instance, the dataset was divided into subsets which were ensured to have balanced class distribution (S5 Table). It should be noted that the data of each scene/unique date were retained in the same set. The split was selected to be ~50/25/25%. More specifically, the split contains 694 training (429,412 px), 328 validation (213,102 px) and 359 test (194,843 px) patches.

Due to the moderate size of MARIDA and aiming at a Marine Debris-oriented dataset, the initial 15 classes were aggregated to 11 classes. The categories of *Wakes*, *CloudS*, *Waves* and *MixWater* were grouped with *MWater* and formed a water super-class, as they semantically belong to the same class as well as present similar spectral profiles (see online material).

Regarding RF training, all models (RF<sub>SS</sub>, RF<sub>SS+SI</sub>, RF<sub>SS+SI+GLCM</sub>) were composed of 125 trees, each with a maximum depth of 20 nodes. Due to pixel-level class distribution, which is by nature imbalanced (e.g., *Marine Water* px contrary to Marine Debris px), we used class weighting inversely proportional to class frequencies in the training set. Additionally, the annotators' confidence score was utilized such that low confidence samples contribute less to the training process. Specifically, the weights for high, moderate and low confidence samples

were 1, 2/3 and 1/3, respectively. The final selection of RF hyperparameters described above was based on grid search in the validation set.

During the U-Net training process, the Adam algorithm was employed to minimize the Cross-Entropy loss with an initial learning rate of  $2 \times 10^{-4}$ . Moreover, we utilized early stopping based on the loss of the validation set and trained for 44 epochs. After the 40<sup>th</sup> epoch, the learning rate was reduced to  $2 \times 10^{-5}$ . The selected batch size was 5 samples. We also employed random rotations of the input images by  $-90^\circ$ ,  $0^\circ$ ,  $90^\circ$ , or  $180^\circ$  and horizontal flips in order to augment the dataset. The selection of the hyperparameters above and training set-up was based on grid search in the validation set. It should be noted that the U-Net model was trained from scratch. A weighting scheme on the Cross-Entropy loss was also utilized, to address the unbalanced data issue [65] (S3 Appendix). Finally, it should be mentioned that in our U-Net baseline, in contrast to RF, we did not experiment with the annotators' confidence levels.

### Baseline experiments and evaluation

This subsection describes the quantitative and qualitative assessment of our ML baseline outcomes in MARIDA. To evaluate our results quantitatively, we demonstrate the scores for all metrics per class on the test set (Table 4). Overall, our results indicate that RF<sub>SS+SI+GLCM</sub> leads to the highest average scores for all metrics, followed by RF<sub>SS+SI</sub> and RF<sub>SS</sub>, which provide almost equivalent average scores. Regarding scores per class, for *SWater*, U-Net provides the highest scores, while for *Ship*, *Clouds*, *MWater* and *Foam*, RF<sub>SS+SI+GLCM</sub> performs best. For *DenS*, RF<sub>SS+SI</sub> leads to the highest scores, as for *SpS*, RF<sub>SS+SI+GLCM</sub> leads to higher scores for IoU and F<sub>1</sub>. For *TWater*, both RF<sub>SS+SI+GLCM</sub> and U-Net achieve similarly high scores. It is noteworthy to highlight that for *SLWater*, all RF models and U-Net achieve for all metrics the highest scores (i.e., 1).

Regarding Marine Debris, RF<sub>SS+SI</sub> performs the highest scores, while adding spatial information does not improve the classification performance results (i.e., IoU and F<sub>1</sub> decreased slightly). Future experiments with different window sizes for the extraction of GLCM textural features may lead to higher scores. We have to note that, for the *NatM* class, all models lead to low scores. *NatM* presents similar spectral behavior to Marine Debris, while both follow the same spatial patterns (e.g., linear trajectories). In this case, adding spectral indices or textural

**Table 4. Evaluation scores obtained by RF<sub>SS</sub>, RF<sub>SS+SI</sub>, RF<sub>SS+SI+GLCM</sub> and U-Net for each class on Marine Debris Archive.** The highest scores are highlighted. All acronyms are stated in Table 2.

| Class   | RF <sub>SS</sub> |             |                | RF <sub>SS+SI</sub> |             |                | RF <sub>SS+SI+GLCM</sub> |             |                | U-Net       |             |                |
|---------|------------------|-------------|----------------|---------------------|-------------|----------------|--------------------------|-------------|----------------|-------------|-------------|----------------|
|         | IoU              | PA          | F <sub>1</sub> | IoU                 | PA          | F <sub>1</sub> | IoU                      | PA          | F <sub>1</sub> | IoU         | PA          | F <sub>1</sub> |
| MD      | 0.55             | 0.91        | 0.71           | <b>0.67</b>         | <b>0.92</b> | <b>0.8</b>     | 0.65                     | <b>0.92</b> | 0.79           | 0.33        | 0.7         | 0.5            |
| DenS    | 0.87             | 0.92        | <b>0.93</b>    | <b>0.88</b>         | <b>0.93</b> | <b>0.93</b>    | 0.87                     | <b>0.93</b> | <b>0.93</b>    | 0.6         | 0.6         | 0.75           |
| SpS     | 0.53             | 0.91        | 0.69           | 0.69                | <b>0.92</b> | 0.82           | <b>0.83</b>              | 0.9         | <b>0.91</b>    | 0.66        | 0.89        | 0.79           |
| NatM    | <b>0.31</b>      | <b>0.47</b> | <b>0.47</b>    | 0.17                | 0.27        | 0.29           | 0.18                     | 0.31        | 0.31           | 0.02        | 0.02        | 0.04           |
| Ship    | 0.54             | 0.72        | 0.7            | 0.47                | 0.7         | 0.64           | <b>0.67</b>              | <b>0.82</b> | <b>0.8</b>     | 0.62        | 0.76        | 0.76           |
| Clouds  | 0.75             | 0.85        | 0.86           | 0.74                | 0.82        | 0.85           | <b>0.84</b>              | <b>0.86</b> | <b>0.91</b>    | 0.62        | 0.62        | 0.76           |
| MWater  | 0.66             | 0.82        | 0.79           | 0.65                | 0.83        | 0.79           | <b>0.75</b>              | <b>0.93</b> | <b>0.86</b>    | 0.61        | 0.88        | 0.76           |
| SLWater | <b>1</b>         | <b>1</b>    | <b>1</b>       | 0.99                | <b>1</b>    | <b>1</b>       | 0.99                     | <b>1</b>    | <b>1</b>       | 0.99        | 0.99        | <b>1</b>       |
| Foam    | 0.23             | 0.29        | 0.37           | 0.31                | 0.48        | 0.47           | <b>0.6</b>               | <b>0.74</b> | <b>0.75</b>    | 0.55        | 0.55        | 0.71           |
| TWater  | 0.74             | 0.78        | 0.85           | 0.8                 | 0.83        | 0.89           | <b>0.88</b>              | 0.92        | <b>0.94</b>    | 0.84        | <b>0.95</b> | 0.91           |
| SWater  | 0.08             | 0.25        | 0.16           | 0.13                | 0.33        | 0.23           | 0.3                      | 0.37        | 0.46           | <b>0.45</b> | <b>0.67</b> | <b>0.62</b>    |
| Average | 0.57             | 0.72        | 0.69           | 0.59                | 0.73        | 0.7            | <b>0.69</b>              | <b>0.79</b> | <b>0.79</b>    | 0.57        | 0.69        | 0.69           |

<https://doi.org/10.1371/journal.pone.0262247.t004>

information leads to lower scores than the initial. Especially, U-Net predicts only few annotated *NatM* pixels on the test set.

Except for the quantitative evaluation described above, a qualitative (visual) assessment of our baseline results on the test set was also performed (Fig 5). As it is easily noticed, the two models, RF<sub>SS+SI+GLCM</sub> and U-Net, provide similar results. Nevertheless, U-Net seems more robust to S2 noise and single pixels with sharp spectral differences than RF. U-Net is capable of modeling the shapes and spatial patterns of sea features, and appeared to be no sensitive in isolated pixels/ spikes, potentially due to the inherent multiple-scale information (successive convolutional layers). On the other hand, RF<sub>SS+SI+GLCM</sub> is more prone to S2 noise and mixed bands resolutions artifact. In particular, in RF<sub>SS+SI+GLCM</sub> results, some pixels around Marine Debris and *SpS* are classified as *Cloud* (Fig 5B and 5D).

In both models, small vessels are classified as Marine Debris (Fig 5C), which is expected due to similar polymer types that are composed and possibly similar floating material proportion within pixel. Regarding *Cloud*, RF<sub>SS+SI+GLCM</sub> predicts more accurately the considered class than U-Net (Fig 5C and 5D), while U-Net predicts better the *SWater* habitats (Fig 5C). The latter fact can be also seen in the highest scores in all U-Net metrics (Table 4). In the coastal zone, both models lead to similar results. However, in U-Net classification images, some *Foam* pixels are predicted as Marine Debris, while in RF results, some *TWater* pixels are classified as *MWater* (Fig 5A).

By assessing our baseline experiments quantitatively and qualitatively, we observe that there is a consistency between metric scores and classification outputs in general. Yet, in some cases, the classification is still challenging. For instance, although both models achieve high scores (in comparison with other classes) for *SpS* (Table 4), in some cases with very sparse conditions, *SpS* pixels are classified as Marine Debris (Fig 5D).

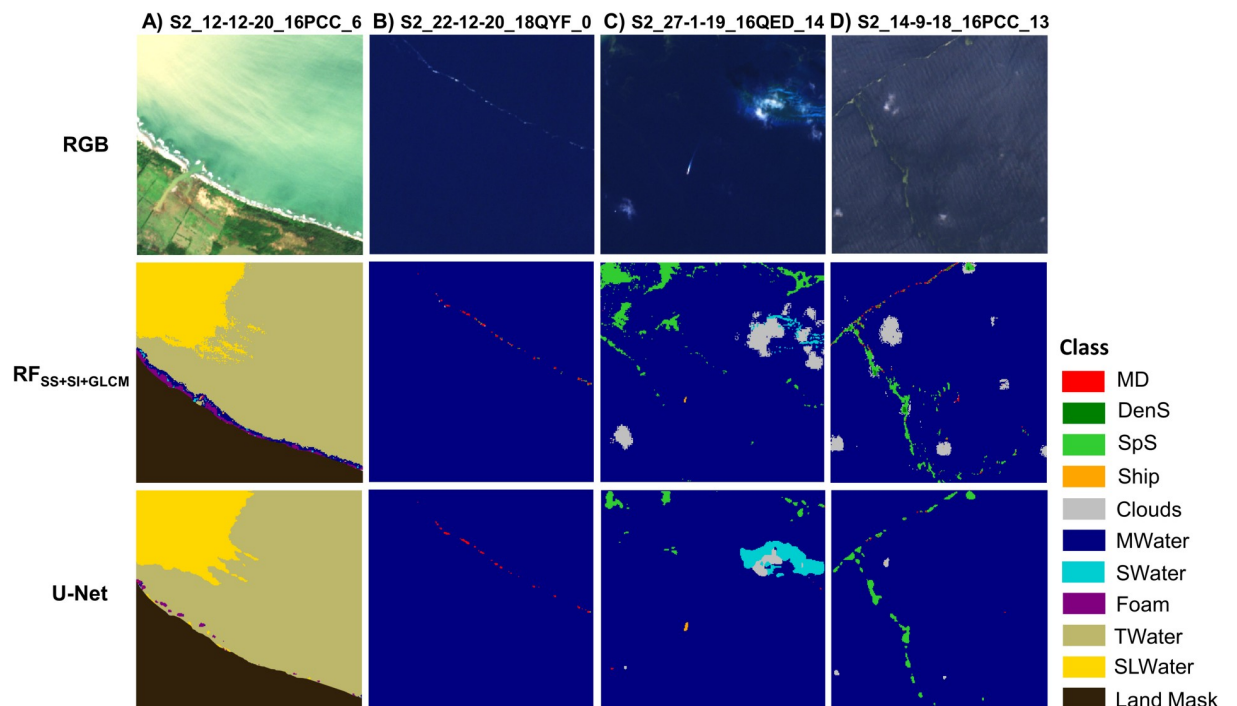

**Fig 5. Classification results extracted by the baseline RF<sub>SS+SI+GLCM</sub> and U-Net models.** Selected indicative cases demonstrate (A) S2\_12-12-20\_16PCC\_6, (B) S2\_22-12-20\_18QYF\_0, (C) S2\_27-1-19\_16QED\_14 and (D) S2\_14-9-18\_16PCC\_13 patches on test set. RGB patches are derived from Sentinel-2 data which were freely downloaded from <https://earthexplorer.usgs.gov/>. All acronyms are stated in Table 2.

<https://doi.org/10.1371/journal.pone.0262247.g005>

For the evaluation scores regarding the multi-label classification task (ResNet) the reader is referred to the [S6 Table](#).

## Discussion and challenges

In this work, a new dataset (MARIDA) is introduced towards triggering the research community at improving and developing new methods for detecting Marine Debris and discriminating from other sea surface features that co-exist. Based on the collected ground-truth, literature review and intensive image interpretation, MARIDA provides 3399 Marine Debris pixels, labelled in different S2 tiles across various countries, different seasons, years and sea state conditions. Thus, MARIDA is an important geodata source for evaluating existing detection methods and developing new techniques based on available S2 data.

After training four different models, the results showed that the developed  $RF_{SS+SI+GLCM}$  achieved the highest scores for all metrics; yet it seems more prone to S2 noise and different bands resolutions than the deep U-Net architecture. Further experimentation with  $RF_{SS+SI+GLCM}$  indicated that the most distinctive feature is the spatial feature CON (i.e, a measure of the intensity difference between a pixel and its neighbour), followed by NDWI, NDVI and FDI (Fig 6 and S5 Appendix and S1 Fig). This fact is also in line with Tasseron et al. [27] who recommended that the combination of FDI and NDVI can be efficient in the separation of vegetation and Marine Debris.

Low-confidence annotations were also included in our dataset, revealing challenging cases where no ground-truth events existed, and thus, human-experts attempted to identify the

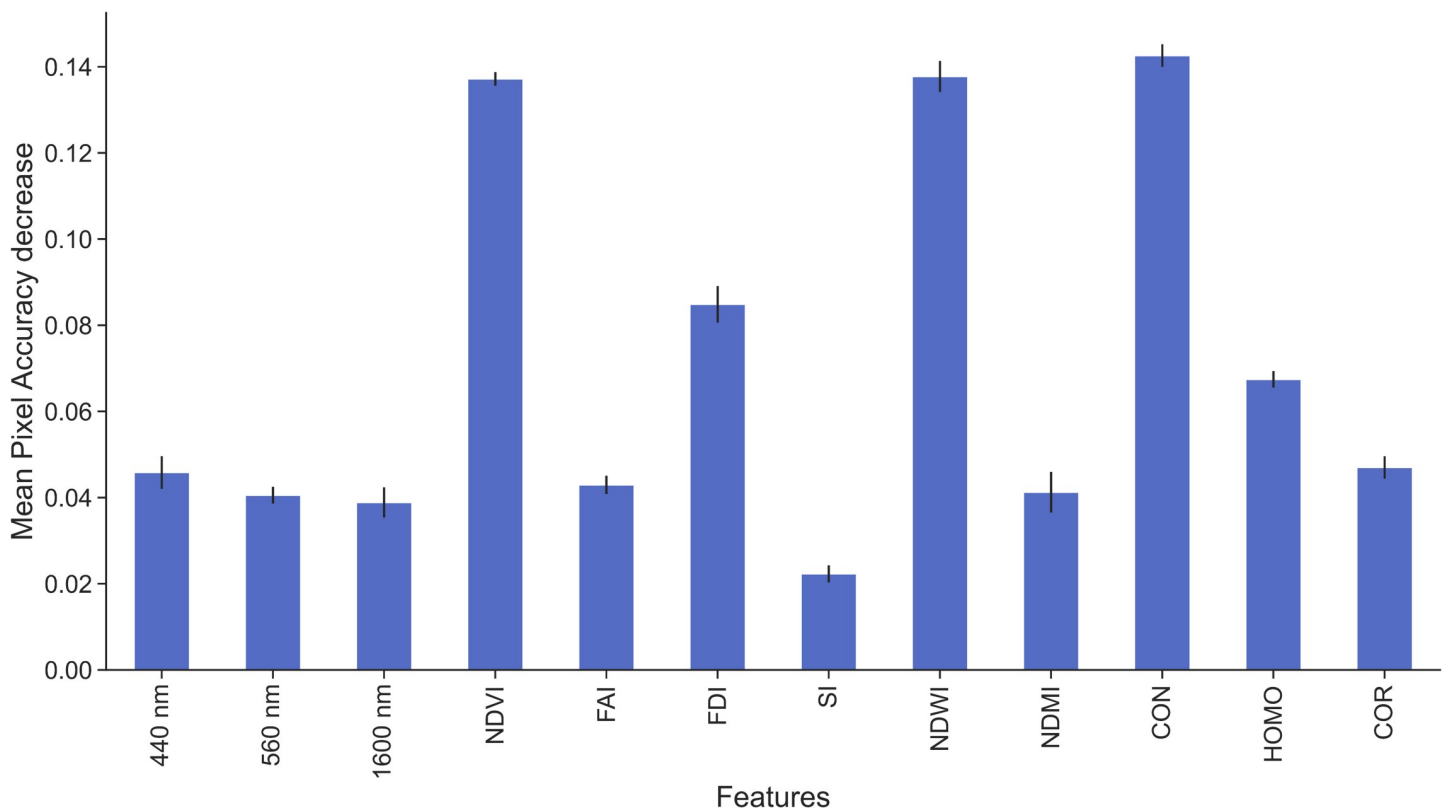

**Fig 6. Features importance using permutation on  $RF_{SS+SI+GLCM}$  model.** Each feature represents a different highly correlated group. The largest mean pixel accuracy decrease occurs by permuting CON, NDWI, NDVI and FDI.

<https://doi.org/10.1371/journal.pone.0262247.g006>

floating materials/ features based on domain knowledge, image interpretation and statistical analysis. Indicative cases include the sparse floating materials detected at fronts (e.g., 1 December 2019 in Jakarta Bay), very turbid conditions (e.g., 12 January 2017 in Honduras), and windrows (29 August 2017 at Yangtze river mouth) where human-experts could not easily define if they were dominated by dense foam or plastic concentrations. In addition, the spectral discrimination of Marine Debris from *NatM* was not straightforward in some cases (e.g., 18 September 2020 PCC). This issue was also observed in a previous study by Moshtaghi et al. [66], demonstrating that the considered floating materials (e.g., brown Marine Debris and woody debris) can have similar spectral patterns.

Regarding MARIDA limitations, it should be noted that the dataset is not optimally balanced geographically due to the lack of open-access in situ data reporting marine litter cases worldwide. MARIDA dataset can be augmented in future works with other datasets (e.g., clouds), other recorded features such as macroalgae species (e.g., *Ulva*, *Noctiluca*), jellyfish blooms [29] and future collections of additional verified Marine Debris events.

Due to S2 spatial resolution, the annotation procedure was occasionally not straightforward. For example, the discrimination between boundary *Ship* pixels and *Wakes* in moving ships was challenging for all experts. Thus, these cases potentially induced slight noise to the dataset. Certain S2 images with erroneous atmospheric corrections, such as the S2 image acquired on 23 September 2020 (Bay Islands, Honduras), were excluded, even though a major Marine Debris event was reported in the region during this date. Furthermore, high cloud coverage did not allow marine litter detection in all available S2 images in Santo Domingo, where a significant event was reported (July 2018).

The ACOLITE Dark Spectrum Fitting (DSF) algorithm was selected in this work after the recommendation from several studies [10, 12, 13, 40], reporting that ACOLITE performed well in detecting marine litter. However, ACOLITE performs simple pixel replication and no interpolation (such as bilinear or cubic) or other more sophisticated methods such as pan-sharpening to resample the S2 20 m and 60 m bands to 10 m.

Despite the limitations mentioned above, MARIDA is designed to be a multi-task dataset with various future aspects. Firstly, the RF model used here can be further enhanced by using spatial information at multiple scales (e.g., GLCM features at different windows size). Further feature-engineering and selection of the most distinctive bands, might improve the RF performance as well. Also, the experimentation with the denoising of the prediction masks (as a meta-classifier) can create more accurate classification outputs.

Regarding U-Net, experimentation with different loss functions and different weighting schemes can potentially address the class imbalance. For instance, the Focal Loss [67] may help the model focus on classes that have not been trained well. Furthermore, the exploitation of annotators' confidence level information should be incorporated into the learning process. Another arising challenge is the combination of the predictions from multiple models (ensemble methods), potentially leading to more promising results. Experimentation with other improved or more sophisticated architectures can also be examined. The integration of advanced pre-processing techniques (i.e., cloud masking, denoising algorithms) should improve Marine Debris detection and sea features classification outcomes [37].

Beyond *weakly supervised* semantic segmentation, MARIDA can be re-used for several remote sensing and ML applications. One straightforward task, which is being proposed in the [S4 Appendix](#), is the *weakly supervised* multi-label classification task (missing labels). Concerning this task, exploring different Curriculum Learning-based strategies for predicting missing labels [63] might be essential. In addition, experimentation with different loss functions can further improve the results. For instance, although the multi-class Cross Entropy loss (Softmax loss) is not tailored for multi-label settings and can be counter-intuitive, it often shows better results [68].

Other tasks derived by MARIDA that could be further explored are the unsupervised classification methods and/or clustering analysis, for better understanding the spectral patterns of sea features. In addition, the produced dataset can be used to evaluate existing spectral indices such as FDI, FAI and optimal thresholds tuning, as well as the development of new spectral indices. Last but not least, by providing annotated water pixels close to Marine Debris, we encourage the readers to further experiment with subtracting nearby water pixels (i.e., reflectance difference), windows-size and x subpixel proportion [40].

## Conclusions

In this work, we present MARIDA, a benchmark dataset for the detection of Marine Debris on S2 multispectral satellite data. MARIDA challenges the research community by: i) offering annotations of Marine Debris and various sea features that co-occur in realistic cases, ii) providing a detailed overview of MARIDA as well as spectral signatures analysis of annotated data, iii) evaluating ML algorithms, and iv) identifying application cases and open issues. Considering that marine litter research is increasing significantly and plastic debris monitoring using remote sensing is still challenging, we provide a Marine Debris dataset appropriate for future detection experiments and ML classification tasks. We envisage the continuous expansion of this dataset, including additional cases from the global oceans.

## Supporting information

**S1 Table. Source of Marine Debris reports with available links.** All links were last accessed on 24 July 2021.

(PDF)

**S2 Table. The revisit time (days) of Sentinel-2 and Planet satellite sensors in study sites.**

(PDF)

**S3 Table. The acquisition dates (day/month/year) of Sentinel-2 satellite data used for MARIDA construction.** Corresponding Planet data (photo-interpretation process) are presented.

(PDF)

**S4 Table. The distribution of the confidence scores in pixel level for the classes of Marine Debris, *Natural Organic Material* and *Sparse Sargassum*.**

(PDF)

**S5 Table. Class distribution (%) for each split in MARIDA.** All acronyms are stated in [Table 2](#).

(PDF)

**S6 Table. Evaluation scores obtained by ResNet for each class on multi-label classification.** All acronyms are stated in [Table 2](#).

(PDF)

**S1 Appendix. Cloud and floating material annotation.**

(PDF)

**S2 Appendix. The evaluation metrics.**

(PDF)

**S3 Appendix. Class weighting scheme.**

(PDF)



**S4 Appendix. ResNet baseline.**

(PDF)

**S5 Appendix. Features correlation and importance.**

(PDF)

**S1 Fig. Features correlation.** (A) Agglomerative hierarchical clustering on Spearman Correlation. (B) Heatmap of features correlation.

(TIF)

## Acknowledgments

We would like to thank Professor Chuanmin Hu and Dr. Lauren Biermann for fruitful discussions about the spectral behaviour of Marine Debris. We would also like to thank Caroline Power and Bobby Handal for collecting and sharing ground truth regarding plastic pollution in Honduras Gulf. We thank Dr. Erasmia Kastanidi for fruitful discussions about the marine litter issue. Last but not least, we thank NVIDIA for supporting us with GPU hardware.

## Author Contributions

**Conceptualization:** Katerina Kikaki, Konstantinos Karantzalos.**Data curation:** Katerina Kikaki, Ioannis Kakogeorgiou, Paraskevi Mikeli.**Methodology:** Katerina Kikaki, Ioannis Kakogeorgiou.**Software:** Ioannis Kakogeorgiou.**Supervision:** Konstantinos Karantzalos.**Writing – original draft:** Katerina Kikaki, Ioannis Kakogeorgiou.**Writing – review & editing:** Katerina Kikaki, Ioannis Kakogeorgiou, Paraskevi Mikeli, Dionysios E. Raitsos, Konstantinos Karantzalos.

## References

1. Zeri C, Adamopoulou A, Bojanić Varezić D, Fortibuoni T, Kovač Viršek M, Kržan A, et al. Floating plastics in Adriatic waters (Mediterranean Sea): From the macro- to the micro-scale. *Marine Pollution Bulletin*. 2018; 136: 341–350. <https://doi.org/10.1016/j.marpolbul.2018.09.016> PMID: 30509816
2. van Emmerik T, van Klaveren J, Meijer LJJ, Krooshof JW, Pamos DAA, Tanchuling MA. Manila River Mouths Act as Temporary Sinks for Macroplastic Pollution. *Front Mar Sci*. 2020;7. <https://doi.org/10.3389/fmars.2020.545812>
3. Kalaroni S, Hatzonikolakis Y, Tsiaras K, Gkanasos A, Triantafyllou G. Modelling the Marine Microplastic Distribution from Municipal Wastewater in Saronikos Gulf (E. Mediterranean). *OFOAJ*. 2019; 9: 1–7. <https://doi.org/10.19080/OFOAJ.2019.09.555752>
4. Digka N, Tsangaris C, Torre M, Anastasopoulou A, Zeri C. Microplastics in mussels and fish from the Northern Ionian Sea. *Mar Pollut Bull*. 2018; 135: 30–40. <https://doi.org/10.1016/j.marpolbul.2018.06.063> PMID: 30301041
5. Maximenko N, Corradi P, Law KL, Van Sebille E, Garaba SP, Lampitt RS, et al. Toward the Integrated Marine Debris Observing System. *Front Mar Sci*. 2019;6. <https://doi.org/10.3389/fmars.2019.00447>
6. Martínez-Vicente V, Clark JR, Corradi P, Aliani S, Arias M, Bochow M, et al. Measuring Marine Plastic Debris from Space: Initial Assessment of Observation Requirements. *Remote Sensing*. 2019; 11: 2443. <https://doi.org/10.3390/rs11202443>
7. Zielinski S, Botero CM, Yanes A. To clean or not to clean? A critical review of beach cleaning methods and impacts. *Marine Pollution Bulletin*. 2019; 139: 390–401. <https://doi.org/10.1016/j.marpolbul.2018.12.027> PMID: 30686442

8. Schmaltz E, Melvin EC, Diana Z, Gunady EF, Rittschof D, Somarelli JA, et al. Plastic pollution solutions: emerging technologies to prevent and collect marine plastic pollution. *Environment International*. 2020; 144: 106067. <https://doi.org/10.1016/j.envint.2020.106067> PMID: 32889484
9. Bellou N, Gambardella C, Karantzas K, Monteiro JG, Canning-Clode J, Kemna S, et al. Global assessment of innovative solutions to tackle marine litter. *Nat Sustain*. 2021; 4: 516–524. <https://doi.org/10.1038/s41893-021-00726-2>
10. Kikaki A, Karantzas K, Power CA, Raitos DE. Remotely Sensing the Source and Transport of Marine Plastic Debris in Bay Islands of Honduras (Caribbean Sea). *Remote Sensing*. 2020; 12: 1727. <https://doi.org/10.3390/rs12111727>
11. Acuña-Ruz T, Uribe D, Taylor R, Amézquita L, Guzmán MC, Merrill J, et al. Anthropogenic marine debris over beaches: Spectral characterization for remote sensing applications. *Remote Sensing of Environment*. 2018; 217: 309–322. <https://doi.org/10.1016/j.rse.2018.08.008>
12. Topouzelis K, Papakonstantinou A, Garaba SP. Detection of floating plastics from satellite and unmanned aerial systems (Plastic Litter Project 2018). *Int J Appl Earth Obs Geoinf*. 2019; 79: 175–183. <https://doi.org/10.1016/j.jag.2019.03.011>
13. Biermann L, Clewley D, Martínez-Vicente V, Topouzelis K. Finding Plastic Patches in Coastal Waters using Optical Satellite Data. *Sci Rep*. 2020; 10: 5364. <https://doi.org/10.1038/s41598-020-62298-z> PMID: 32327674
14. Kremezi M, Kristollari V, Karathanassi V, Topouzelis K, Kolokoussis P, Taggio N, et al. Pansharpening PRISMA Data for Marine Plastic Litter Detection Using Plastic Indexes. *IEEE Access*. 2021; 9: 61955–61971. <https://doi.org/10.1109/ACCESS.2021.3073903>
15. García-Garin O, Monleón-Getino T, López-Brosa P, Borrell A, Aguilar A, Borja-Robalino R, et al. Automatic detection and quantification of floating marine macro-litter in aerial images: Introducing a novel deep learning approach connected to a web application in R. *Environmental Pollution*. 2021; 273: 116490. <https://doi.org/10.1016/j.envpol.2021.116490> PMID: 33486249
16. Jakovljevic G, Govedarica M, Alvarez-Taboada F. A Deep Learning Model for Automatic Plastic Mapping Using Unmanned Aerial Vehicle (UAV) Data. *Remote Sensing*. 2020; 12: 1515. <https://doi.org/10.3390/rs12091515>
17. Wolf M, Berg K van den, Garaba SP, Gnann N, Sattler K, Stahl F, et al. Machine learning for aquatic plastic litter detection, classification and quantification (APLastic-Q). *Environ Res Lett*. 2020; 15: 114042. <https://doi.org/10.1088/1748-9326/abbd01>
18. Martin C, Parkes S, Zhang Q, Zhang X, McCabe MF, Duarte CM. Use of unmanned aerial vehicles for efficient beach litter monitoring. *Marine Pollution Bulletin*. 2018; 131: 662–673. <https://doi.org/10.1016/j.marpolbul.2018.04.045> PMID: 29886994
19. Bao Z, Sha J, Li X, Hanchiso T, Shifaw E. Monitoring of beach litter by automatic interpretation of unmanned aerial vehicle images using the segmentation threshold method. *Marine Pollution Bulletin*. 2018; 137: 388–398. <https://doi.org/10.1016/j.marpolbul.2018.08.009> PMID: 30503448
20. Papakonstantinou A, Batsaris M, Spondylidis S, Topouzelis K. A Citizen Science Unmanned Aerial System Data Acquisition Protocol and Deep Learning Techniques for the Automatic Detection and Mapping of Marine Litter Concentrations in the Coastal Zone. *Drones*. 2021; 5: 6. <https://doi.org/10.3390/drones5010006>
21. Lieshout C van, Oeveren K van, Emmerik T van, Postma E. Automated River Plastic Monitoring Using Deep Learning and Cameras. *Earth and Space Science*. 2020; 7: e2019EA000960. <https://doi.org/10.1029/2019EA000960>
22. Politikos DV, Fakiris E, Davvetas A, Klampanos IA, Papatheodorou G. Automatic detection of seafloor marine litter using towed camera images and deep learning. *Marine Pollution Bulletin*. 2021; 164: 111974. <https://doi.org/10.1016/j.marpolbul.2021.111974> PMID: 33485020
23. Themistocleous K, Papoutsas C, Michaelides S, Hadjimitsis D. Investigating Detection of Floating Plastic Litter from Space Using Sentinel-2 Imagery. *Remote Sensing*. 2020; 12: 2648. <https://doi.org/10.3390/rs12162648>
24. Garaba SP, Dierssen HM. Hyperspectral ultraviolet to shortwave infrared characteristics of marine-harvested, washed-ashore and virgin plastics. *Earth System Science Data*. 2020; 12: 77–86. <https://doi.org/10.5194/essd-12-77-2020>
25. Garaba SP, Acuña-Ruz T, Mattar CB. Hyperspectral longwave infrared reflectance spectra of naturally dried algae, anthropogenic plastics, sands and shells. *Earth System Science Data*. 2020; 12: 2665–2678. <https://doi.org/10.5194/essd-12-2665-2020>
26. Knaeps E, Sterckx S, Strackx G, Mijndonckx J, Moshtaghi M, Garaba SP, et al. Hyperspectral-reflectance dataset of dry, wet and submerged marine litter. *Earth System Science Data*. 2021; 13: 713–730. <https://doi.org/10.5194/essd-13-713-2021>

27. Tasserone P, van Emmerik T, Peller J, Schreyers L, Biermann L. Advancing Floating Macroplastic Detection from Space Using Experimental Hyperspectral Imagery. *Remote Sensing*. 2021; 13: 2335. <https://doi.org/10.3390/rs13122335>
28. Garaba SP, Arias M, Corradi P, Harmel T, de Vries R, Lebreton L. Concentration, anisotropic and apparent colour effects on optical reflectance properties of virgin and ocean-harvested plastics. *Journal of Hazardous Materials*. 2021; 406: 124290. <https://doi.org/10.1016/j.jhazmat.2020.124290> PMID: 33390286
29. Qi L, Hu C, Mikelsons K, Wang M, Lance V, Sun S, et al. In search of floating algae and other organisms in global oceans and lakes. *Remote Sensing of Environment*. 2020; 239: 111659. <https://doi.org/10.1016/j.rse.2020.111659>
30. Garaba SP, Dierssen HM. An airborne remote sensing case study of synthetic hydrocarbon detection using short wave infrared absorption features identified from marine-harvested macro- and microplastics. *Remote Sensing of Environment*. 2018; 205: 224–235. <https://doi.org/10.1016/j.rse.2017.11.023>
31. Dierssen HM, Garaba SP. Bright Oceans: Spectral Differentiation of Whitecaps, Sea Ice, Plastics, and Other Flotsam. In: Vlahos P, Monahan EC, editors. *Recent Advances in the Study of Oceanic Whitecaps: Twixt Wind and Waves*. Cham: Springer International Publishing; 2020. pp. 197–208. [https://doi.org/10.1007/978-3-030-36371-0\\_13](https://doi.org/10.1007/978-3-030-36371-0_13)
32. Airbus Ship Detection Challenge. 16 Jun 2021 [cited 16 Jun 2021]. Available: <https://kaggle.com/c/airbus-ship-detection>.
33. Liu Z, Yuan L, Weng L, Yang Y. A High Resolution Optical Satellite Image Dataset for Ship Recognition and Some New Baselines. 2017. pp. 324–331. Available: <https://www.scitepress.org/Link.aspx?doi=10.5220/0006120603240331>
34. Tang J, Deng C, Huang G-B, Zhao B. Compressed-Domain Ship Detection on Spaceborne Optical Image Using Deep Neural Network and Extreme Learning Machine. *IEEE Trans Geosci Remote Sens*. 2015; 53: 1174–1185. <https://doi.org/10.1109/TGRS.2014.2335751>
35. Heiselberg P, Heiselberg H. Ship-Iceberg Discrimination in Sentinel-2 Multispectral Imagery by Supervised Classification. *Remote Sensing*. 2017; 9: 1156. <https://doi.org/10.3390/rs9111156>
36. Kristollari V, Karathanassi V. Artificial neural networks for cloud masking of Sentinel-2 ocean images with noise and sunglint. *International Journal of Remote Sensing*. 2020; 41: 4102–4135. <https://doi.org/10.1080/01431161.2020.1714776>
37. Wang M, Hu C. Automatic Extraction of Sargassum Features From Sentinel-2 MSI Images. *IEEE Trans Geosci Remote Sens*. 2021; 59: 2579–2597. <https://doi.org/10.1109/TGRS.2020.3002929>
38. Ody A, Thibaut T, Berlin L, Changeux T, André J-M, Chevalier C, et al. From In Situ to satellite observations of pelagic Sargassum distribution and aggregation in the Tropical North Atlantic Ocean. *PLOS ONE*. 2019; 14: e0222584. <https://doi.org/10.1371/journal.pone.0222584> PMID: 31527915
39. Zhou Z-H. A brief introduction to weakly supervised learning. *National Science Review*. 2018; 5: 44–53. <https://doi.org/10.1093/nsr/nwx106>
40. Hu C. Remote detection of marine debris using satellite observations in the visible and near infrared spectral range: Challenges and potentials. *Remote Sensing of Environment*. 2021; 259: 112414. <https://doi.org/10.1016/j.rse.2021.112414>
41. Lebreton LCM, van der Zwet J, Damsteeg J-W, Slat B, Andrady A, Reisser J. River plastic emissions to the world's oceans. *Nat Commun*. 2017; 8: 15611. <https://doi.org/10.1038/ncomms15611> PMID: 28589961
42. Schmidt C, Krauth T, Wagner S. Export of Plastic Debris by Rivers into the Sea. *Environ Sci Technol*. 2017; 51: 12246–12253. <https://doi.org/10.1021/acs.est.7b02368> PMID: 29019247
43. Zhao S, Wang T, Zhu L, Xu P, Wang X, Gao L, et al. Analysis of suspended microplastics in the Changjiang Estuary: Implications for riverine plastic load to the ocean. *Water Research*. 2019; 161: 560–569. <https://doi.org/10.1016/j.watres.2019.06.019> PMID: 31238221
44. Jang YC, Lee J, Hong S, Mok JY, Kim KS, Lee YJ, et al. Estimation of the annual flow and stock of marine debris in South Korea for management purposes. *Marine Pollution Bulletin*. 2014; 86: 505–511. <https://doi.org/10.1016/j.marpolbul.2014.06.021> PMID: 25038983
45. Cordova MR, Nurhati IS. Major sources and monthly variations in the release of land-derived marine debris from the Greater Jakarta area, Indonesia. *Sci Rep*. 2019; 9: 18730. <https://doi.org/10.1038/s41598-019-55065-2> PMID: 31822708
46. Vanhellemont Q, Ruddick K. Atmospheric correction of metre-scale optical satellite data for inland and coastal water applications. *Remote Sensing of Environment*. 2018; 216: 586–597. <https://doi.org/10.1016/j.rse.2018.07.015>
47. Hu C. A novel ocean color index to detect floating algae in the global oceans. *Remote Sensing of Environment*. 2009; 113: 2118–2129. <https://doi.org/10.1016/j.rse.2009.05.012>

48. Cózar A, Aliani S, Basurko OC, Arias M, Isobe A, Topouzelis K, et al. Marine Litter Windrows: A Strategic Target to Understand and Manage the Ocean Plastic Pollution. *Front Mar Sci*. 2021;8. <https://doi.org/10.3389/fmars.2021.571796>
49. Hu C, Feng L, Hardy RF, Hochberg EJ. Spectral and spatial requirements of remote measurements of pelagic Sargassum macroalgae. *Remote Sensing of Environment*. 2015; 167: 229–246. <https://doi.org/10.1016/j.rse.2015.05.022>
50. Kanjir U, Greidanus H, Oštir K. Vessel detection and classification from spaceborne optical images: A literature survey. *Remote Sensing of Environment*. 2018; 207: 1–26. <https://doi.org/10.1016/j.rse.2017.12.033> PMID: 29622842
51. Liu Y, Zhao J, Qin Y. A novel technique for ship wake detection from optical images. *Remote Sensing of Environment*. 2021; 258: 112375. <https://doi.org/10.1016/j.rse.2021.112375>
52. Kubryakov AA, Kudryavtsev VN, Stanichny SV. Application of Landsat imagery for the investigation of wave breaking. *Remote Sensing of Environment*. 2021; 253: 112144. <https://doi.org/10.1016/j.rse.2020.112144>
53. Dierssen HM. Hyperspectral Measurements, Parameterizations, and Atmospheric Correction of Whitecaps and Foam From Visible to Shortwave Infrared for Ocean Color Remote Sensing. *Front Earth Sci*. 2019;7. <https://doi.org/10.3389/feart.2019.00014>
54. Maaten L van der, Hinton G. Visualizing Data using t-SNE. *Journal of Machine Learning Research*. 2008; 9: 2579–2605.
55. Kruse FA, Lefkoff AB, Boardman JW, Heidebrecht KB, Shapiro AT, Barloon PJ, et al. The spectral image processing system (SIPS)—interactive visualization and analysis of imaging spectrometer data. *Remote Sensing of Environment*. 1993; 44: 145–163. [https://doi.org/10.1016/0034-4257\(93\)90013-N](https://doi.org/10.1016/0034-4257(93)90013-N)
56. Breiman L. Random Forests. *Machine Learning*. 2001; 45: 5–32. <https://doi.org/10.1023/A:1010933404324>
57. Ronneberger O, Fischer P, Brox T. U-Net: Convolutional Networks for Biomedical Image Segmentation. In: Navab N, Hornegger J, Wells WM, Frangi AF, editors. *Medical Image Computing and Computer-Assisted Intervention—MICCAI 2015*. Cham: Springer International Publishing; 2015. pp. 234–241. [https://doi.org/10.1007/978-3-319-24574-4\\_28](https://doi.org/10.1007/978-3-319-24574-4_28)
58. Robinson C, Malkin K, Jojic N, Chen H, Qin R, Xiao C, et al. Global Land Cover Mapping with Weak Supervision: Outcome of the 2020 IEEE GRSS Data Fusion Contest. *IEEE Journal of Selected Topics in Applied Earth Observations and Remote Sensing*. 2021; 1–1. <https://doi.org/10.1109/JSTARS.2021.3063849>
59. Haralick RM, Shanmugam K, Dinstein I. Textural Features for Image Classification. *IEEE Transactions on Systems, Man, and Cybernetics*. 1973; SMC-3: 610–621. <https://doi.org/10.1109/TSMC.1973.4309314>
60. Richardson AJ, Everitt JH. Using spectral vegetation indices to estimate rangeland productivity. *Geocarto International*. 1992; 7: 63–69. <https://doi.org/10.1080/10106049209354353>
61. Everingham M, Eslami SMA, Van Gool L, Williams CKI, Winn J, Zisserman A. The Pascal Visual Object Classes Challenge: A Retrospective. *Int J Comput Vis*. 2015; 111: 98–136. <https://doi.org/10.1007/s11263-014-0733-5>
62. Kanehira A, Harada T. Multi-label Ranking from Positive and Unlabeled Data. 2016 IEEE Conference on Computer Vision and Pattern Recognition (CVPR). 2016. pp. 5138–5146. <https://doi.org/10.1109/CVPR.2016.555>
63. Durand T, Mehrasa N, Mori G. Learning a Deep ConvNet for Multi-Label Classification With Partial Labels. *IEEE Computer Society*; 2019. pp. 647–657. <https://doi.org/10.1109/CVPR.2019.00074>
64. He K, Zhang X, Ren S, Sun J. Deep Residual Learning for Image Recognition. 2016 IEEE Conference on Computer Vision and Pattern Recognition (CVPR). 2016. pp. 770–778. <https://doi.org/10.1109/CVPR.2016.90>
65. Paszke A, Chaurasia A, Kim S, Culurciello E. ENet: A Deep Neural Network Architecture for Real-Time Semantic Segmentation. *arXiv:160602147 [cs]*. 2016. Available: <http://arxiv.org/abs/1606.02147>.
66. Moshtaghi M, Knaeps E, Sterckx S, Garaba S, Meire D. Spectral reflectance of marine macroplastics in the VNIR and SWIR measured in a controlled environment. *Sci Rep*. 2021; 11: 5436. <https://doi.org/10.1038/s41598-021-84867-6> PMID: 33686150
67. Lin T-Y, Goyal P, Girshick R, He K, Dollár P. Focal Loss for Dense Object Detection. 2017 IEEE International Conference on Computer Vision (ICCV). 2017. pp. 2999–3007. <https://doi.org/10.1109/ICCV.2017.324>
68. Mahajan D, Girshick R, Ramanathan V, He K, Paluri M, Li Y, et al. Exploring the Limits of Weakly Supervised Pretraining. 2018. pp. 181–196. Available: [https://openaccess.thecvf.com/content\\_ECCV\\_2018/html/Dhruv\\_Mahajan\\_Exploring\\_the\\_Limits\\_ECCV\\_2018\\_paper.html](https://openaccess.thecvf.com/content_ECCV_2018/html/Dhruv_Mahajan_Exploring_the_Limits_ECCV_2018_paper.html).
